# Supplementary material
Source: publisher figshare collection journal article supplement (https://acs.figshare.com/ndownloader/files/4781905)
Supplement: Supplementary file 1 [file 4781905]

**Supporting Information for the Manuscript Entitled**

# Laterally Nanostructured Vesicles, Polygonal Bilayer Sheets, and Segmented Wormlike Micelles

*Zhibo Li,<sup>†</sup> Marc A. Hillmyer,<sup>\*,†</sup> and Timothy P. Lodge<sup>\*,†,‡</sup>*

University of Minnesota, Minneapolis, Minnesota 55455

<sup>†</sup>Department of Chemistry

<sup>‡</sup>Department of Chemical Engineering and Materials Science

\*Authors for correspondence: hillmyer@chem.umn.edu (M.A.H), lodge@chem.umn.edu (T.P.L.)

## Experiments

**Materials.** Three polyethylethylene-*b*-poly(ethylene oxide) (EO) diblock copolymers, with a hydroxyl group at the block junction, were synthesized by two successive anionic polymerizations; the E block was obtained by catalytic hydrogenation of a 1,2-polybutadiene precursor, prior to initiation of the PEO block.<sup>1</sup> The mid-hydroxyl functionality was obtained by use of 2-methoxymethoxymethyl-oxirane as the terminating agent in the butadiene polymerization. The  $\mu$ -(polyethylethylene)poly(ethylene oxide)poly(perfluoropropylene oxide) [ $\mu$ -EOF] miktoarm star terpolymers were obtained through a coupling reaction between the mid-hydroxyl functionalized EO diblock copolymer with an acid-chloride end-functionalized poly(perfluoropropylene oxide) homopolymer (PFPO) according to an established procedure.<sup>2</sup> The detailed synthesis and molecular characterization of the  $\mu$ -EOF terpolymers can be found elsewhere.<sup>2</sup> The terpolymers are designated as  $\mu$ -EOF(*x-y-z*), where *x*, *y*, and *z* denote the molecular weights in kg mol<sup>-1</sup> of the E, O, and F blocks, respectively. The PEE and PFPO blocks have glass transition temperatures of approximately -20 °C<sup>3</sup> and -63 °C,<sup>4</sup> respectively.

**General Methods.** Size exclusion chromatography (SEC) was performed on a Hewlett Packard series 1100 liquid chromatography system equipped with a Hewlett Packard 1047A refractive index (RI) detector and three Jordi polydivinylbenzene columns of 10<sup>4</sup>, 10<sup>3</sup>, and 500 Å pore sizes, calibrated with polystyrene standards. THF was used as the mobile phase (40 °C and 1 mL/min). NMR spectra were acquired using Varian INOVA 300 or 500 spectrometers at room temperature. PFPO was dissolved in Freon-113 and  $\mu$ -EOF terpolymers were dissolved in a mixture of Freon-113 and CDCl<sub>3</sub>.

**Cryogenic Transmission Electron Microscopy (cryoTEM).** CryoTEM samples were prepared in a controlled environment vitrification system, which was saturated with water vapor. All the samples were prepared at room temperature. Typically, a micropipette was used to load a drop of micelle solution ( $\sim 5 \mu\text{L}$ ) onto a lacey supported grid, held by tweezers. The excess solution was blotted with a piece of filter paper, resulting in the formation of thin films of *ca.* 100 ~ 300 nm thickness in the holes. After allowing about 20 seconds for relaxation, the samples were quickly plunged into a reservoir of liquid ethane near its melting temperature ( $-183^\circ\text{C}$ ) cooled by liquid nitrogen. The vitrified samples were then stored in liquid nitrogen until they were transferred to, and mounted on, a cryogenic sample holder (Gatan 626) and examined with a JEOL 1210 TEM (120 keV) at  $-178^\circ\text{C}$ . The phase contrast was enhanced by underfocus. The images were recorded on a Gatan 724 multiscan CCD and processed with DigitalMicrographs version 3.3.1. The ramp-shaped optical density gradients in the background were digitally corrected. In the cryoTEM images shown in this paper, the F domains appear dark and E domains appear gray due to the electron density difference. The O coronas are well solvated with water and normally invisible.

## Complementary cryoTEM results

In order to give a more detailed picture and elucidate the vesicle growth mechanism, we present a series of cryoTEM images obtained from aqueous solutions of these terpolymers. The three specifically selected  $\mu$ -EOF star terpolymers have comparable chain length between E and F blocks. The volume ratio of hydrocarbon (E) to fluorocarbon (F) ( $V_E/V_F = 1.2$ ) is less than those  $\mu$ -EOF terpolymers reported elsewhere.<sup>5</sup> The fully stretched lengths of E and F blocks are estimated to 5.9 and 5.2 nm, respectively, based on a zig-zag chain conformation. Figure S1 shows the cryoTEM images obtained from a 1 wt% aqueous solution of  $\mu$ -EOF(1.4-5-2.5), which forms predominate segmented worm-like micelles with a broad length distribution. Also, no micelle morphology transition observed after the same micelle solution was annealed at 50 °C for a few days demonstrated by cryoTEM images shown in Figure S2. This result indicates that the segmented wormlike micelle is the thermodynamically preferred morphology by  $\mu$ -EOF(1.4-5-2.5) in contrast to  $\mu$ -EOF(1.4-3-2.5).

Figure S3 provides complementary cryoTEM images to Figure 2. After considerable annealing time (~20 days) at room temperature, the hexagonal shaped bilayer sheet is the dominant micelle morphology from a collection of cryoTEM images. It was well known that bilayer sheets are the intermediate structure in the transition from micelle to vesicles.<sup>6-10</sup> Meanwhile, the bilayer sheets were rarely observed as a stable structure for lipid surfactants because the large energy penalty for the edge in terms of line tension.<sup>11,12</sup> The exceptions are in the catanionic surfactant system, i.e., a mixture of cationic and anionic surfactants, where the disk edge can be stabilized by electrostatic interactions,<sup>13-15</sup> or in polymeric surfactant with high molecular weight, where the bilayer structures were kinetically frozen.<sup>16,17</sup>



Figure S4 shows the cryoTEM images from a 1 wt%  $\mu$ -EOF(1.4-3-2.5) micelle solution, which was stirred at room temperature for 17 days and at 50 °C for 3 days. Apparently, a slightly thermal anneals substantially increases the vesicles proportion to bilayer sheets and segmented worms in contrast to the images shown in Figure 2 and Figure S3. This result demonstrates that the nanostructured bilayer sheets are the intermediate transition structures to vesicles, however with laterally distributed nano-compartments composed of different chemical identities.

For the sample  $\mu$ -EOF(1.4-2-2.5), a terpolymer with shorter O block than  $\mu$ -EOF(1.4-3-2.5), a vesicle morphology must be thermodynamically preferred due to further increased edge energy. Large proportions of fully formed vesicles or nearly complete closure of vesicles with a protruding segmented worm are observed in Figure S5. A feature here is that no bilayer sheets were observed coexisting with worms and vesicles. Although  $\mu$ -EOF(1.4-2-2.5) terpolymer thermodynamically prefers vesicle morphology, its dissolution proceeds much slower than that of  $\mu$ -EOF(1.4-3-2.5) because of its shorter O blocks. Long time thermal annealing is necessary to obtain substantial vesicle formation.

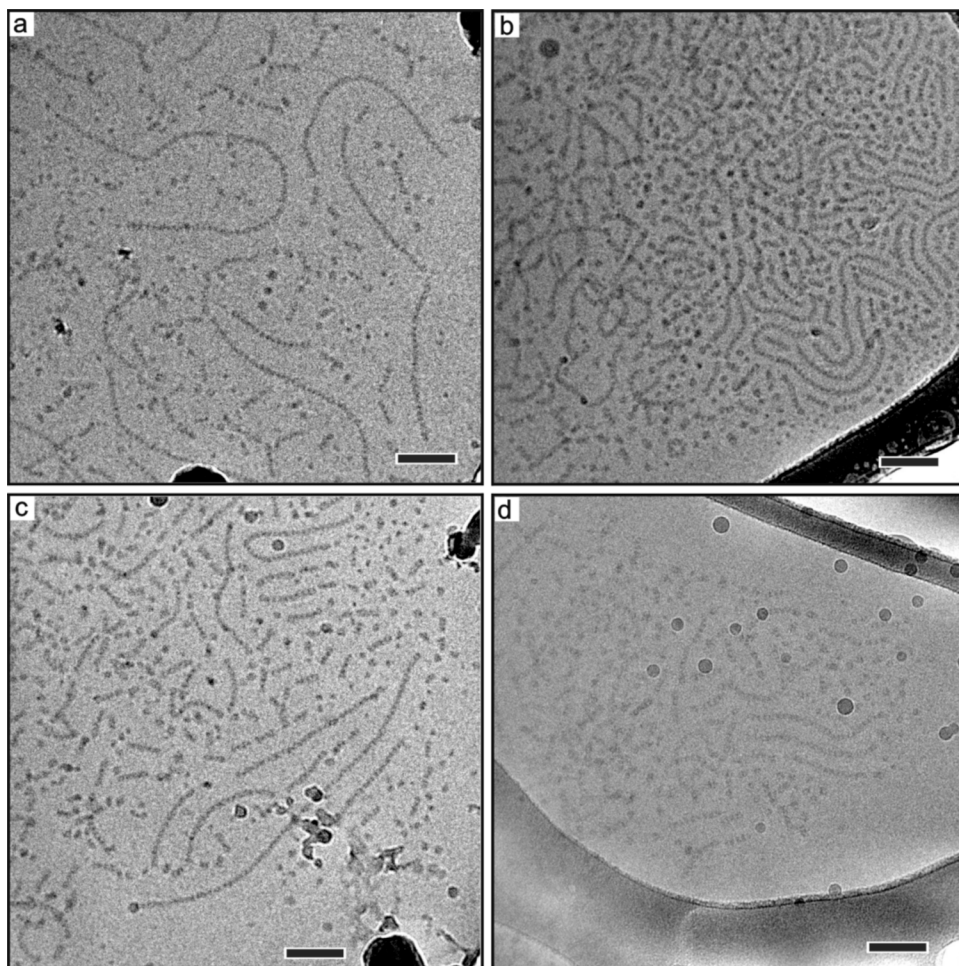

**Figure S1.** Segmented wormlike micelles formation from  $\mu$ -EOF(1.4-5-2.5) terpolymer. The cryoTEM images were obtained from a 1 wt% aqueous solution of  $\mu$ -EOF(1.4-5-2.5) stirred at room temperature for 23 days. Scale bar indicates 100 nm.

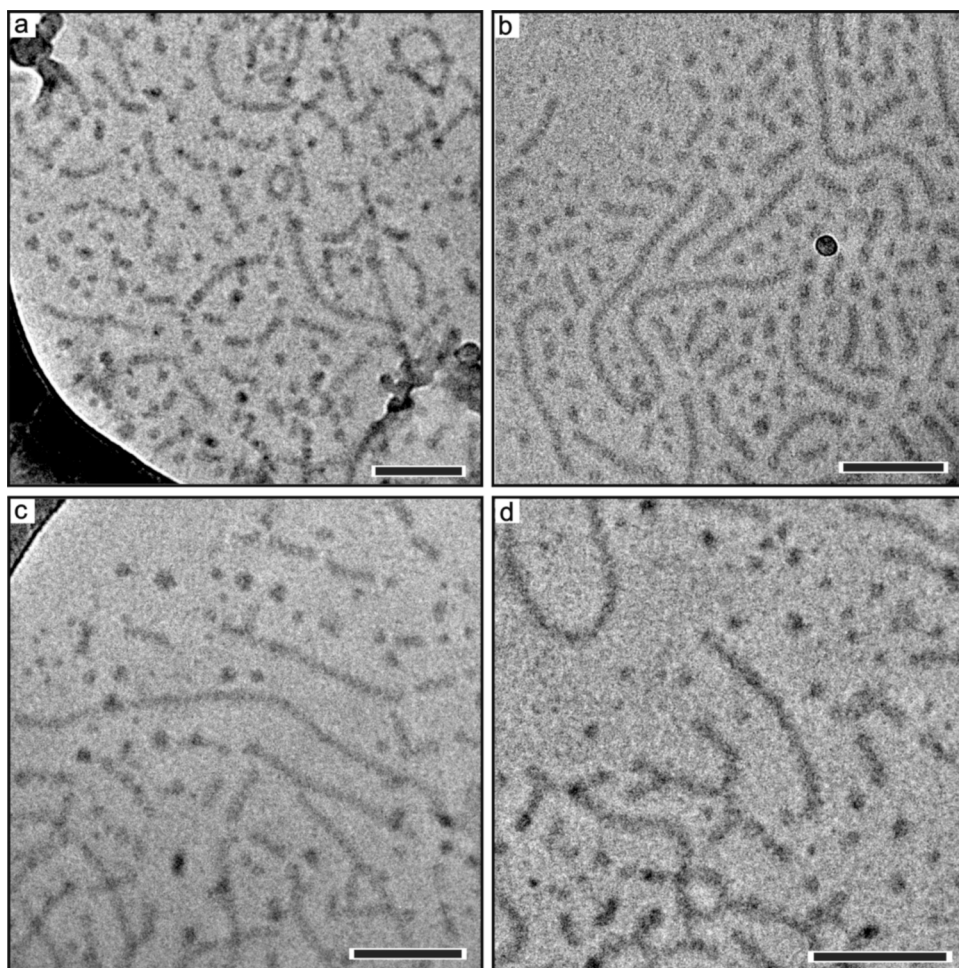

**Figure S2.** Thermal stability of segmented wormlike micelles formed from  $\mu$ -EOF(1.4-5-2.5) terpolymer. The cryoTEM images obtained from a 1 wt% aqueous solution of  $\mu$ -EOF(1.4-5-2.5) stirred at room temperature for 12 days and at 50 °C for 3 days . Scale bar indicates 100 nm.

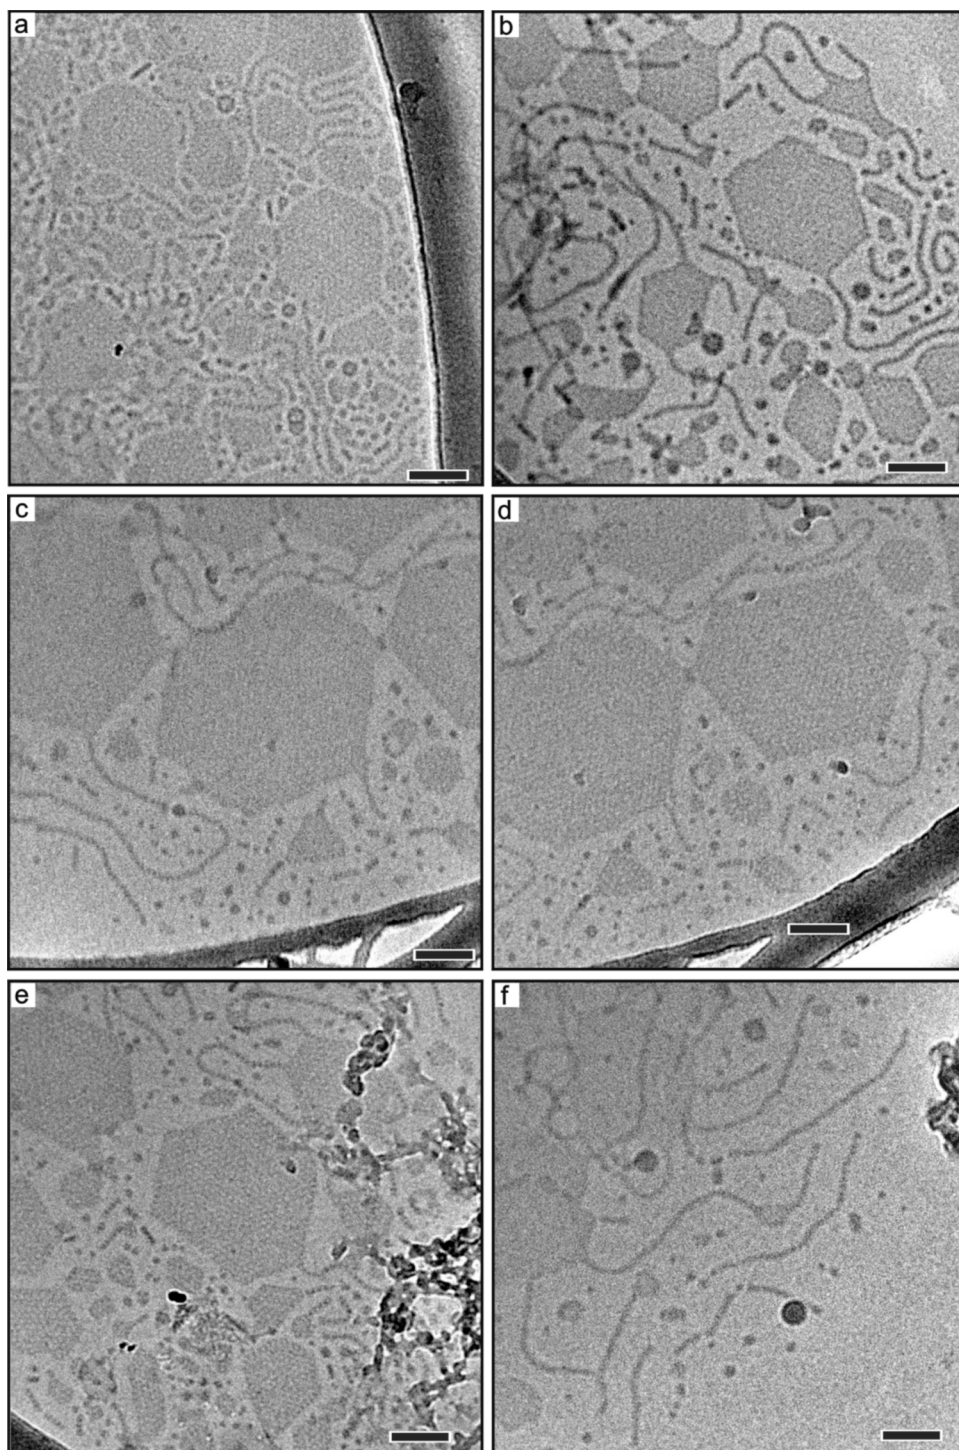

Continue on next page

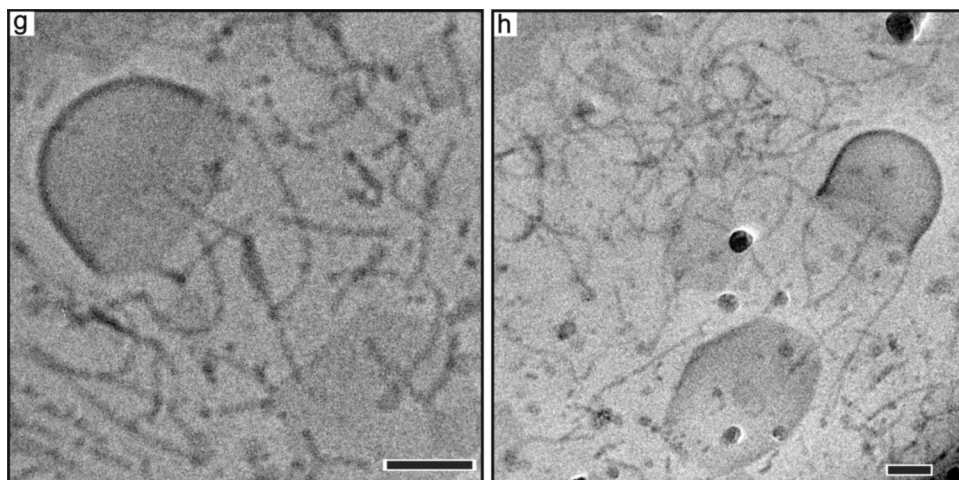

**Figure S3.** Nanostructured bilayer sheets and semi-vesicles formation from  $\mu$ -EOF(1.4-3-2.5) terpolymer. CryoTEM images obtained from a 1 wt% aqueous solution of  $\mu$ -EOF(1.4-3-2.5) stirred at room temperature for 20 days. Scale bar indicates 100 nm.

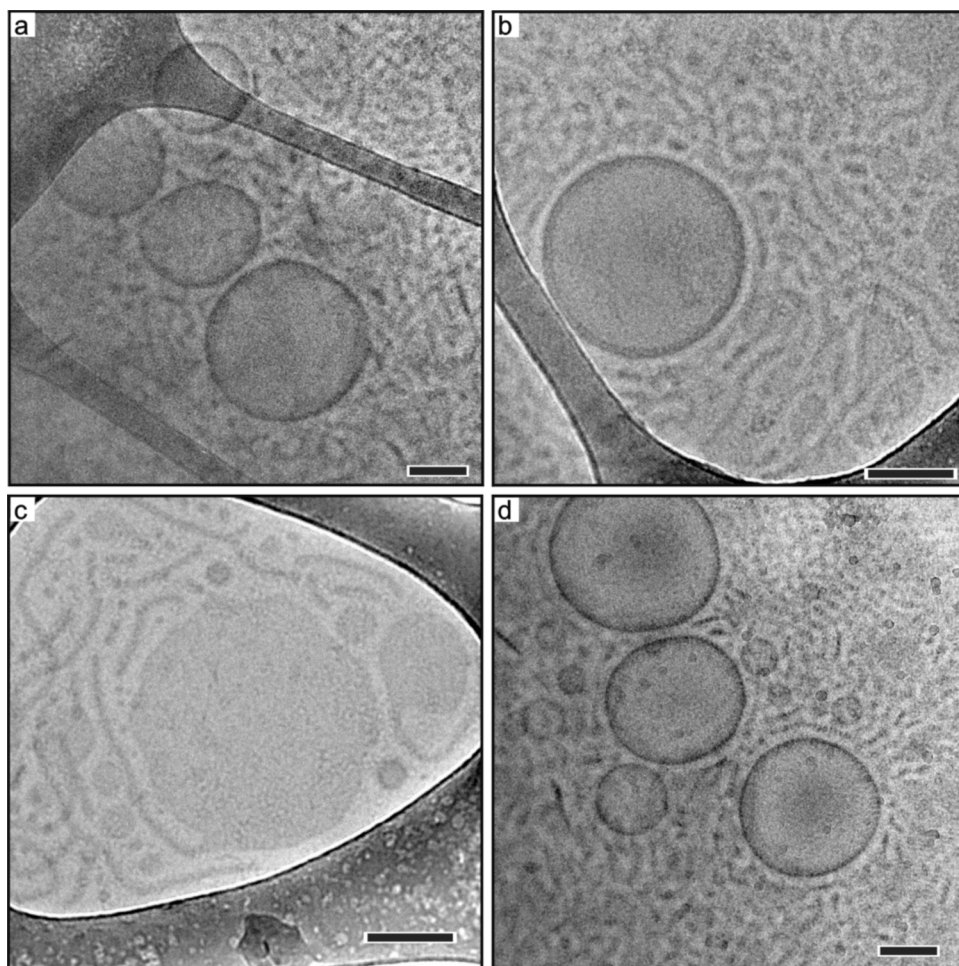

**Figure S4.** Thermal induced transition from bilayer sheets to vesicles in  $\mu$ -EOF(1.4-3-2.5) micelle solution. The cryoTEM were images obtained from a 1 wt% aqueous solution of  $\mu$ -EOF(1.4-3-2.5) stirred at room temperature for 17 days and at 50 °C for 3 days. Scale bar indicates 100 nm.

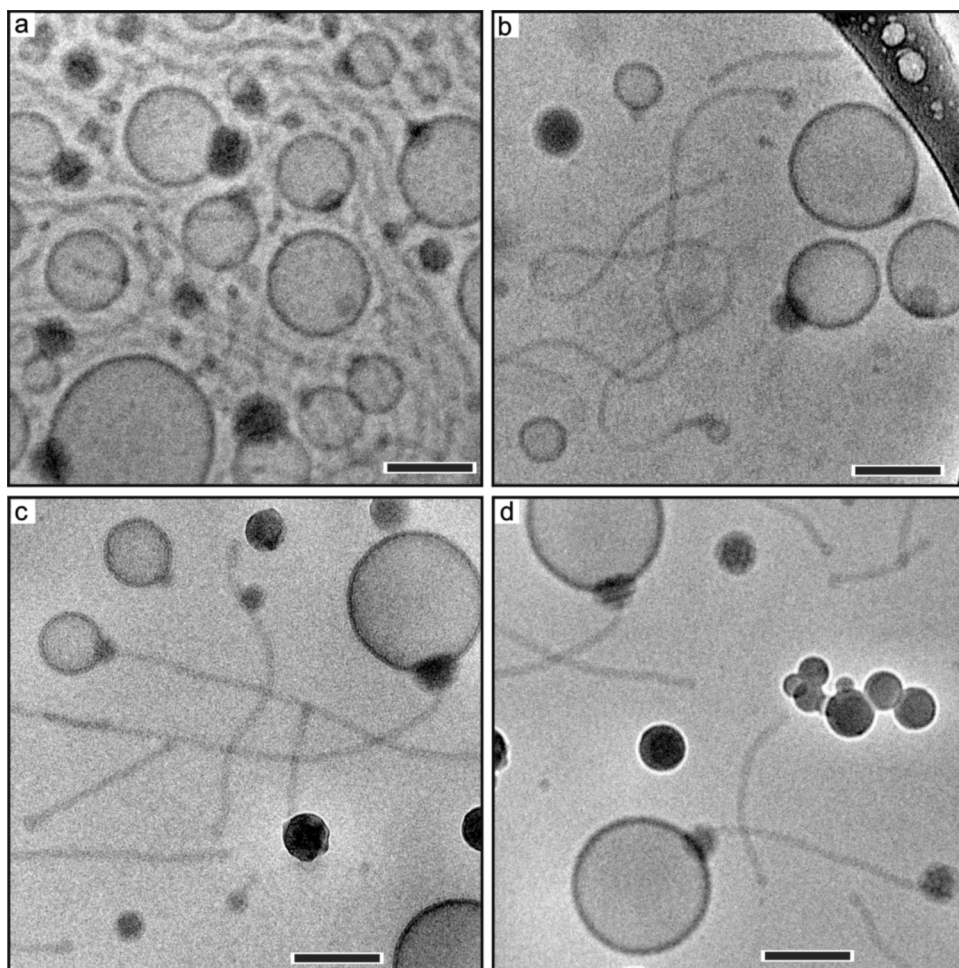

**Figure S5.** Nanostructured vesicle formation from  $\mu$ -EOF(1.4-2-2.5) terpolymer. The cryoTEM images were obtained from a 1 wt% aqueous solution of  $\mu$ -EOF(1.4-2-2.5) stirred at 50 °C for more than 3 weeks. Scale bar indicates 100 nm.

## Molecular characterization

The synthesis and characterization of heterobifunctional polyethylethylene (PEE) has been reported elsewhere.<sup>2</sup> The PEE block used here has 22 repeating units determined by both <sup>1</sup>H NMR and MALDI-TOF MS, and its polydispersity (PDI) is 1.06 determined by SEC. The obtained mid-functional polyethylethylene-b-polyethylene oxide (PEE-PEO) diblock copolymers after deprotection reaction have relatively narrow molecular weight distribution, i.e., PDI = 1.41, 1.28, and 1.09 for EO(1.4-5), EO(1.4-3), and EO(1.4-2), respectively, as the corresponding SEC traces shown in Figure S13. The conversion of the deprotection is above 95% as confirmed by <sup>1</sup>H NMR. The poly(perfluoropropylene oxide) (PFPO) has average 14 repeating units as determined by <sup>19</sup>F NMR spectrometry. The desired coupling reaction was confirmed by both <sup>1</sup>H NMR and <sup>19</sup>F NMR spectrometry. The efficiency of coupling between mid-hydroxyl functionalized EO diblock and acid chloride functionalized PFPO homopolymer is more than 90% as also estimated from <sup>1</sup>H NMR. Generally, we followed the identical procedures that we used before.<sup>2</sup> The molecular parameters for these three  $\mu$ -EOF terpolymers are summarized in Table S1.



**Table S1.** Molecular parameters of  $\mu$ -EOF star terpolymers

| Sample                | $^a N_{\text{PEE}}$ | $^a N_{\text{PEO}}$ | $^a N_{\text{PFPO}}$ | $^b f_{\text{PEO}}$ | $^b f_{\text{PFPO}}$ |
|-----------------------|---------------------|---------------------|----------------------|---------------------|----------------------|
| $\mu$ -EOF(1.4-5-2.5) | 22                  | 115                 | 14                   | 0.61                | 0.18                 |
| $\mu$ -EOF(1.4-3-2.5) | 22                  | 74                  | 14                   | 0.50                | 0.22                 |
| $\mu$ -EOF(1.4-2-2.5) | 22                  | 46                  | 14                   | 0.38                | 0.28                 |

<sup>a</sup>Degree of polymerization determined by H or F NMR for E, O, and F blocks, respectively. The volume fractions were calculated using the molecular weight and RT densities of  $\rho_{(\text{PEE})} = 0.815 \text{ g/cm}^3$ ,<sup>4</sup>  $\rho_{(\text{PEO})} = 1.12 \text{ g/cm}^3$  (amorphous),<sup>18</sup> and  $\rho_{(\text{PFPO})} = 1.9 \text{ g/cm}^3$ .<sup>19</sup>

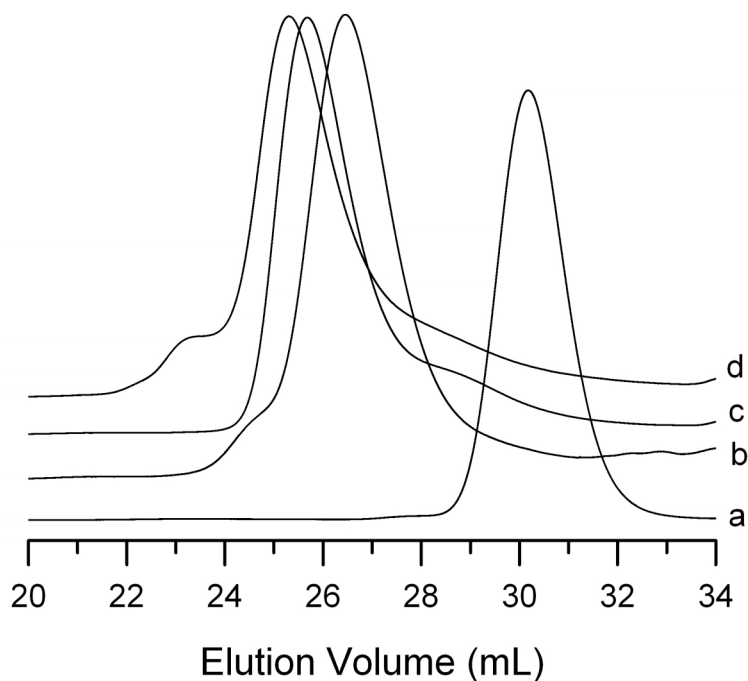

**Figure S6.** SEC traces of PEE homopolymer and EO diblock copolymers: (a) PEE homopolymer, (b) EO(1.4-2), (c) EO(1.4-3), and (d) EO(1.4-5) diblock copolymers.

## References:

- (1) Hillmyer, M. A.; Bates, F. S. *Macromolecules* **1996**, *29*, 6994.
- (2) Li, Z.; Hillmyer, M. A.; Lodge, T. P. *Macromolecules* **2004**, *37*, 8933.
- (3) Zhu, S.; Edmonds, W. F.; Hillmyer, M. A.; Lodge, T. P. *J. Polym. Sci.: Part B: Polym. Phys.* **2005**, *43*, 3685.
- (4) Fetters, L. J.; Lohse, D. J.; Richter, D.; Witten, T. A.; Zirkel, A. *Macromolecules* **1994**, *27*, 4639.
- (5) Li, Z.; Kesselman, E.; Talmon, Y.; Hillmyer, M. A.; Lodge, T. P. *Science* **2004**, *306*, 98.
- (6) Fromherz, P. *Chem. Phys. Lett.* **1983**, *94*, 259.
- (7) Egelhaaf, S. U.; Schurtenberger, P. *Phys. Rev. Lett.* **1999**, *82*, 2804.
- (8) Shioi, A.; Hatton, T. A. *Langmuir* **2002**, *18*, 7341.
- (9) Weiss, T. M.; Narayanan, T.; Wolf, C.; Gradzielski, M.; Panine, P.; Finet, S.; Helsby, W. I. *Phys. Rev. Lett.* **2005**, *94*, 038303.
- (10) Sevink, G. J. A.; Zvelindovsky, A. V. *Macromolecules* **2005**, *38*, 7502.
- (11) Antonietti, M.; Förster, S. *Adv. Mater.* **2003**, *15*, 1323.
- (12) Förster, S. Polymer Vesicles, *In Encyclopedia of Polymer Science and Technology*; John Wiley & Sons: New York, 2005.
- (13) Zemb, T.; Dubois, M.; Demé, B.; Gulik-Krzywicki, T. *Science* **1999**, *283*, 816.
- (14) Jung, H.-T.; Lee, S. Y.; Kaler, E. W.; Coldren, B.; Zasadzinski, J. A. *Proc. Natl. Acad. Sci. USA* **2002**, *99*, 15318.
- (15) Jung, H. T.; Coldren, B.; Zasadzinski, J. A.; Iampietro, D. J.; Kaler, E. W. *Proc. Natl. Acad. Sci. USA* **2001**, *98*, 1353.
- (16) Jain, S.; Bates, F. S. *Macromolecules* **2004**, *37*, 1511.
- (17) Jain, S.; Bates, F. S. *Science* **2003**, *300*, 460.
- (18) Smith, G. D.; Yoon, D. Y.; Jaffe, R. L.; Colby, R. H.; Krishnamoorti, R.; Fetters, L. J. *Macromolecules* **1996**, *29*, 3462.
- (19) Provided by Dupont.
